# Supplementary material for: An hourglass-shaped nickel-based polyoxometalate crystalline material as a highly efficient bifunctional electrocatalyst for the oxygen evolution reaction and detection of H2O2
Source: Royal Society of Chemistry journal article supplement (doi:10.1039/d3qi02401f), 2024-01-01
Supplement: d3qi02401f1.pdf [file d3qi02401f1.pdf]

**An hourglass-shaped nickel-based polyoxometalate crystalline material as a highly-efficient bifunctional electrocatalyst for the oxygen evolution reaction and detection of H<sub>2</sub>O<sub>2</sub>**

**Yajie Li<sup>ab</sup>, Na Zhu<sup>ab</sup>, Zhixuan Su<sup>ab</sup>, Xiaoli Hu<sup>\*a,b</sup>, Zhiyu Dou<sup>\*a</sup>, Zhongmin Su<sup>\*a,b,c</sup>**

<sup>a</sup>School of Chemistry and Environmental Engineering, Changchun University of Science and Technology, Changchun, 130022, China.

<sup>b</sup>Jilin Provincial Science and Technology Innovation Center of Optical Materials and Chemistry, Changchun, 130022, China.

<sup>c</sup>State Key Laboratory of Supramolecular Structure and Materials, Institute of Theoretical Chemistry, College of Chemistry, Jilin University, Changchun, 130021, China.

## Contents

### Experimental section

**Fig.S1** Assembly process of CUST-576.

**Fig.S2** The Topographies of CUST-576 in 1-D chain-like structure.

**Fig.S3** The IR spectrum of CUST-576.

**Fig.S4** Powder X-ray diffraction patterns of CUST-576.

**Fig.S5** (a) XRD and (b) FTIR spectra of CUST-576 in different pH aqueous solutions(pH=10-13).

**Fig.S6** The TGA curves of CUST-576.

**Fig.S7** N<sub>2</sub> adsorption isotherms of CUST-576 and CUST-576@AB (1:2) hybrids at 77 K.

**Fig.S8** Polarization curve of CUST-576、Bare GCE and Carbon black in 1M KOH solution, (b) Polarization curve of CUST-576&AB and CUST-576(Ni<sub>0</sub>)&AB.

**Fig.S9** (a) Comparison of Overpotential and Tafel slope in CUST-576, CUST-576&:AB (1:2、 2:1).

**Fig.S10** (a) CV curve of CUST-576&AB (1:2) in 1M KOH (20-200mV s<sup>-1</sup>). (b) CV curve of CUST-576 in 1M KOH (20-200mV s<sup>-1</sup>).

**Fig.S11** (a) CV curve of CUST-576&AB (1:2), RuO<sub>2</sub>, and IrO<sub>2</sub> in 1M KOH.

**Fig.S12** SEM image of CUST-576&AB: (a-b) after OER and (c-d) after the long-term stability, EDX elemental mapping images of CUST-576&AB after OER (e-j).

**Fig.S13** Cyclic voltammetry curve of CUST-576&AB in 1.0 M KOH.

**Fig.S14** PXRD pattern of CUST-576&AB after OER.

**Fig.S15** XPS image of CUST-576 and CUST-576&AB. Initial: (a) Mo 3d, (b) P 2p. After:(c) Mo 3d, (d) P 2p. The dotted curve was used to demonstrate the experimental data, while the solid line was used to illustrate the fitting results.

**Fig. S16** The first-ten-cycle LSV curves in 1 M KOH after OER.

**Fig.S17** (a) CVs (Cyclic Voltammograms) of {P<sub>4</sub>Mo<sub>6</sub>}-GCE at different scanning rates, (b) CV comparison of GCE, AB, CUST-576, and CUST-576@AB, (c) CVs of {P<sub>4</sub>Mo<sub>6</sub>}-GCE at different scanning rates in 4 mM H<sub>2</sub>O<sub>2</sub>, (d) Interference testing.

**Fig. S17** Optical microscopic images of CUST-576 and CUST-576(Ni<sub>0</sub>) (a) and (b).

**Table S1** Crystal data and structure refinement for CUST-576.

**Table S2** Bond Lengths for CUST-576.

**Table S3** Bond Angles for CUST-576.

## EXPERIMENTAL SECTION

### Materials

All chemicals used were commercially obtained and used without any additional purification. Reagents:  $\text{Na}_2\text{MoO}_4 \cdot 2\text{H}_2\text{O}$ ,  $\text{NiCl}_2 \cdot 6\text{H}_2\text{O}$ , 1,3,5-Tri(1H-imidazol-1-yl)benzene (timb), NaOH, Carbon black(AB), Methanol( $\text{CH}_3\text{OH}$ ), Deionized water,  $\text{H}_3\text{PO}_4$  (85%), Isopropanol (IPA) and 5 w% Nafion solution.

### Synthesis of CUST-576 and CUST-576( $\text{Ni}_0$ )

$\text{Na}_2\text{MoO}_4 \cdot 2\text{H}_2\text{O}$  (0.436 g, 1 mmol),  $\text{NiCl}_2 \cdot 6\text{H}_2\text{O}$  (0.153 g, 0.65 mmol), timb (0.07 g, 0.2 mmol), and  $\text{H}_3\text{PO}_4$  (0.1 mL) were accurately weighed, and added deionized water (5 mL), and  $\text{CH}_3\text{OH}$  (1 mL) at room temperature and stirred for 1h. The pH of the solution was then adjusted to 1.5 using 1 M NaOH, and the mixed solution was transferred to a 15 mL Teflon-lined autoclave and heated at 180 °C for 3 days in a constant-temperature blast dryer and then lowered to room temperature at 10 °C/h. After the solution was washed and dried with deionized water, orange block crystals of CUST-576 were isolated. The optical microscopic images of CUST-576 was shown in **Fig.S18a†**. Anal. Found: C, 11.27; H, 1.0; N, 5.26.

The synthesis process of CUST-576( $\text{Ni}_0$ ) was similar to that of CUST-576, except that not add  $\text{NiCl}_2 \cdot 6\text{H}_2\text{O}$ . After the solution was washed and dried with deionized water, reddish-brown crystals of CUST-576( $\text{Ni}_0$ ) were isolated. The optical microscopic image of CUST-576( $\text{Ni}_0$ ) was shown in **Fig.S18b†**.

There are some activation processes during our synthesis of CUST-576. The dissolution of the metal-oxygen clusters and ligands is further accelerated by adjusting the pH of the solution (flocculent precipitation occurs if the pH is too high or too low) and heating it up to a temperature of 180 °C (the orange-red color with a fair shape but very small grains is obtained at temperatures of 160 °C and 170 °C) to promote the assembly of metal-oxygen clusters with the ligands. The metal-oxygen clusters and the ligands are crystallized in the process of programmed cooling thus obtaining the target material.

### Preparation of working electrode

The inclusion of CUST-576 with carbon black was conducted by grinding 10 mg of CUST-576 crystals with carbon black. The mass ratios employed were 1:1, 1:2, 1:4, 2:1, and 4:1 for CUST-576 to carbon black, respectively. Subsequently, the resulting ground samples were dispersed in a 0.2 mL solution of containing 5% Nafion solution. 10 mg of crystals were milled with carbon black in mass ratio of 1:2, and the milled samples were dispersed into 0.4 mL of 5% Nafion solution, the dispersion was subjected to sonication for efficient mixing. Then, 5  $\mu$ L of the resulting ink was carefully dripped onto glassy carbon electrodes. Finally, the electrodes with the ink deposit were left to dry under ambient air conditions and dried to produce a working electrode with loads of 0.28 and 0.78  $\text{mg}\cdot\text{cm}^{-2}$ , respectively.

### **Instrumentation and characterization**

Single-crystal X-diffraction data for CUST-576 were collected by using a Bruker APEX II diffractometer with Mo  $K\alpha$  radiation ( $\lambda = 0.71073 \text{ \AA}$ ) at the temperature of 298(2) K. The structure was analyzed using the SHELXL-14 software and refined using the weighted matrix least squares method. Crystal data and structural refinement for CUST-576 are listed in **Table S1**. The partial bond lengths and angles of CUST-576 are listed in **Tables S2 -S3**. The CCDC code for CUST-576 is 2258244.

Fourier Transform Infrared (FTIR) spectra were analyzed in the wavelength range of 4000 - 400  $\text{cm}^{-1}$  using a Nicolet 380 FTIR spectrophotometer. Thermogravimetric analysis (TGA) was performed using a DTG 60AH instrument, with a heating temperature of 30-800  $^{\circ}\text{C}$  and a heating rate of 10  $^{\circ}\text{C min}^{-1}$ . Powder X-ray diffraction (PXRD) patterns were analyzed on a Rigaku D-max 2550 instrument using Cu  $K\alpha$  ( $\lambda = 1.5406 \text{ \AA}$ ) radiation. X-ray photoelectron spectroscopy (XPS) was performed on a Thermo ESCALAB 250 instrument. The samples were characterized morphologically and analyzed by energy spectrum using Scanning Electron Microscopy (SU8000).

### **Electrochemical measurements**

Electrochemical measurements were conducted at ambient temperature (25 $^{\circ}\text{C}$ ) employing a conventional three-electrode system. The synthesized catalyst material was used as the working electrode; the Hg/HgO and graphite rod were used as the reference electrode and the counter electrode, respectively. Cyclic voltammetry (CV),

impedance (AC), linear scanning voltammetry (LSV), and stability (I-T) tests were performed on the CHI760E workstation.

All the potentials measured against the SCE electrode were converted to potentials versus the reversible hydrogen electrode (RHE) according to the equation  $E_{(RHE)} = E_{(vs. SCE)} + 0.098V + 0.059pH$ . The Tafel slope is obtained by fitting the linear region of the Tafel curve according to the Tafel equation ( $\eta = a + b \log(j)$ ). The long-term stability was measured by using a chronoamperometric method and a multistep chronoamperometric method. The long-term chronoamperometric measurement was carried out at a given constant potential. All of the electrochemical data were offered without iR correction.

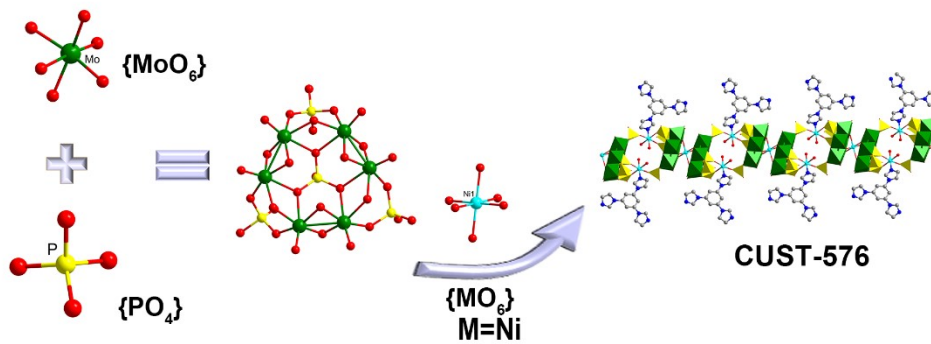

Fig. S1 Assembly process of CUST-576.

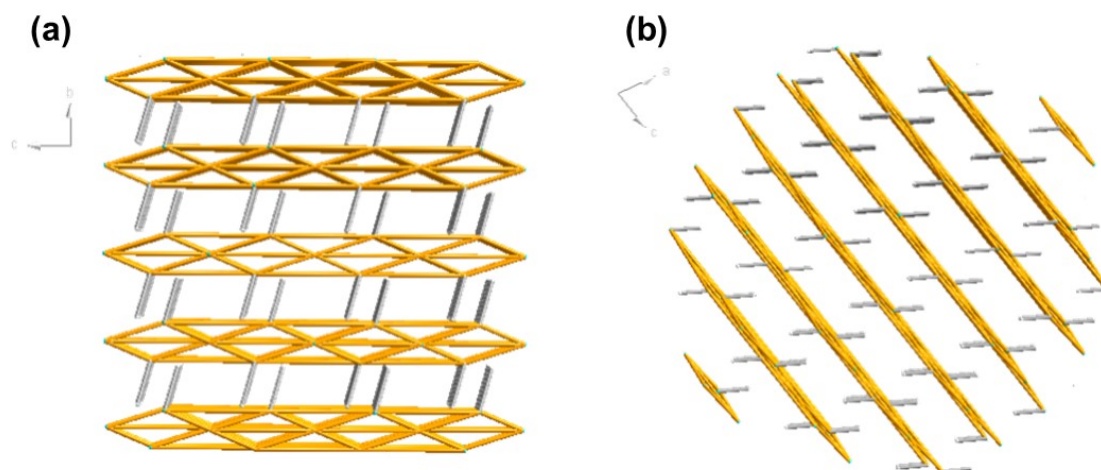

Fig. S2 The Topographies of CUST-576 in 1-D chain-like structure.

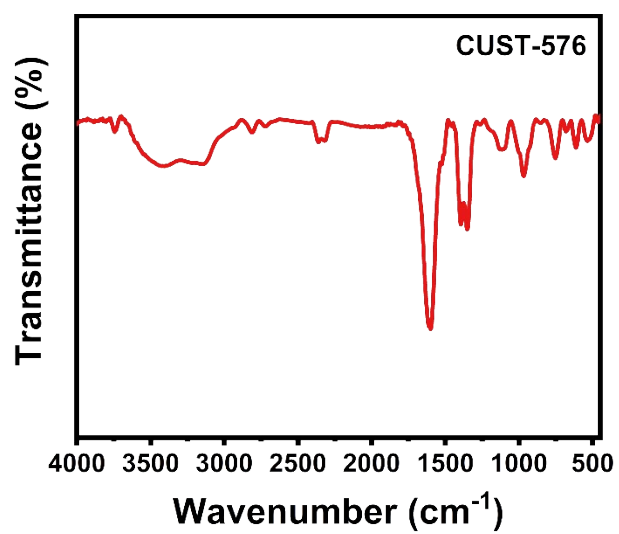

Fig. S3 The IR spectrum of CUST-576.

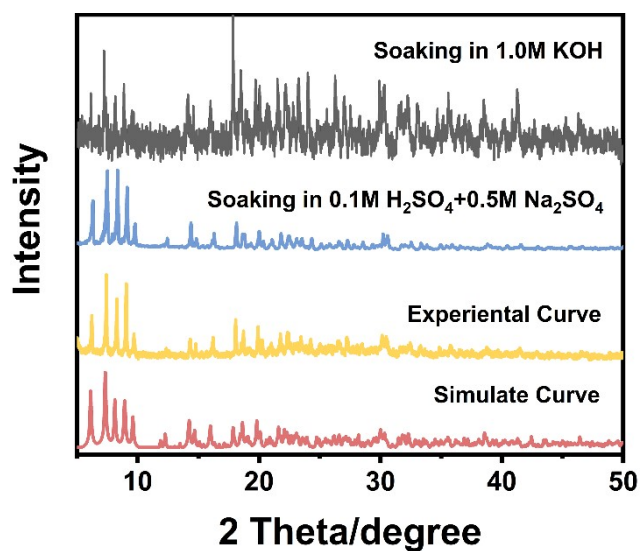

Fig. S4 Powder X-ray diffraction patterns of CUST-576.

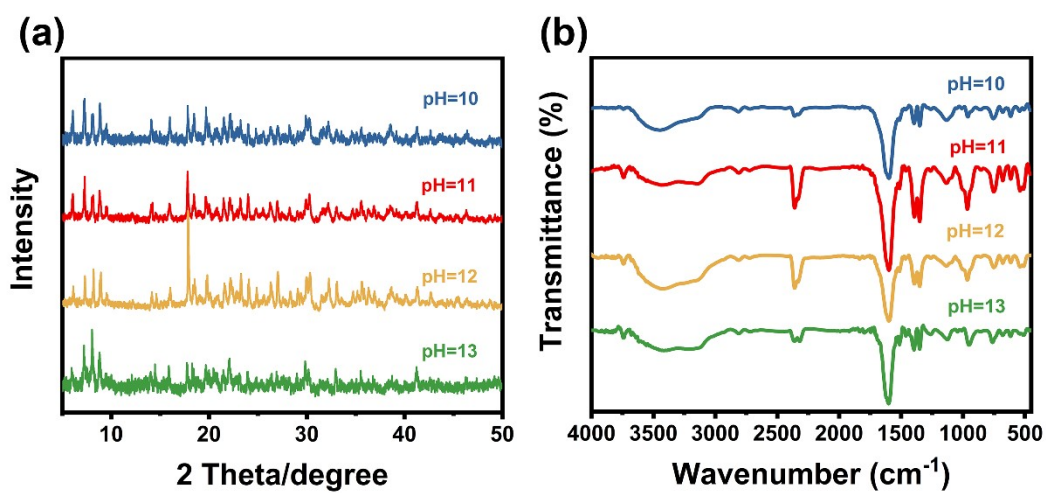

Fig. S5 (a) XRD and (b) FTIR spectra of CUST-576 in different pH aqueous solutions (pH=10-13).

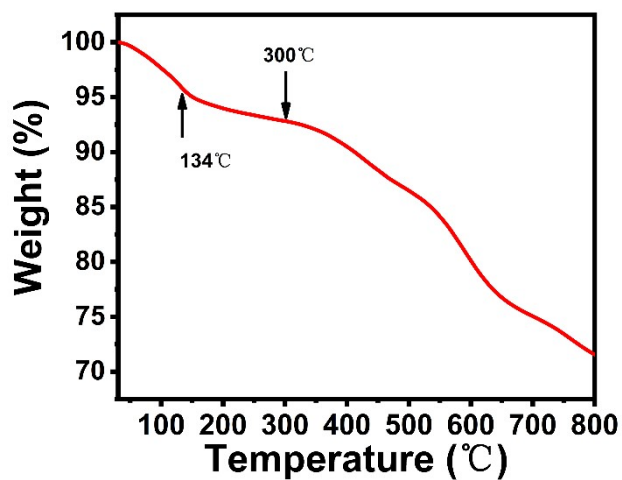

Fig. S6 The TGA curves of CUST-576.



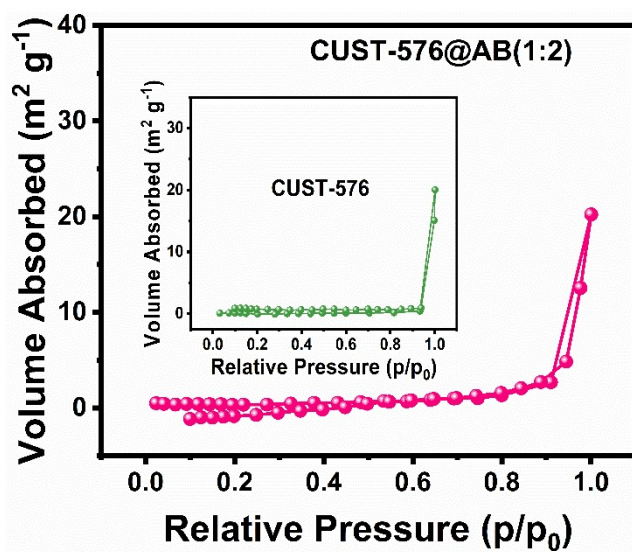

Fig. S7 N<sub>2</sub> adsorption isotherms of CUST-576 and CUST-576@AB (1:2) hybrids at 77 K.

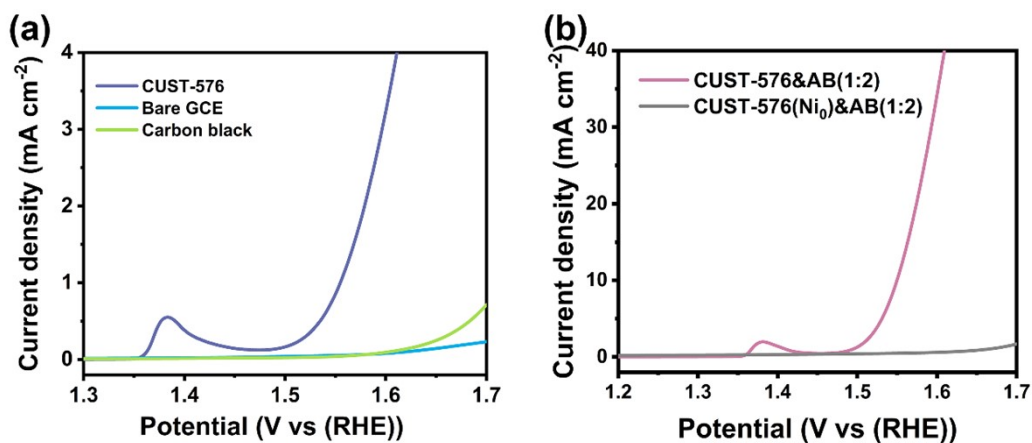

Fig. S8 (a) Polarization curve of CUST-576, Bare GCE and Carbon black in 1M KOH solution, (b) Polarization curve of CUST-576&AB and CUST-576(Ni<sub>0</sub>)&AB.

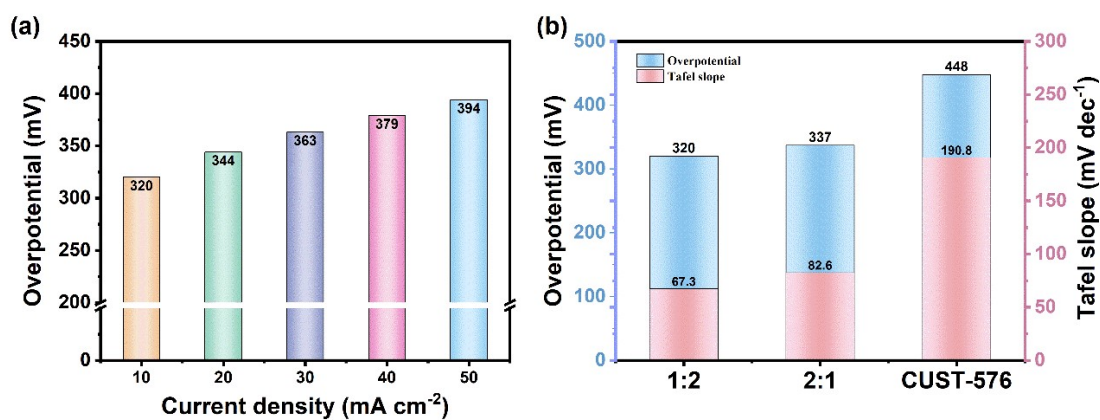

Fig. S9 (a) Comparison of Overpotential and Tafel slope in CUST-576, CUST-576&AB (1:2、2:1).

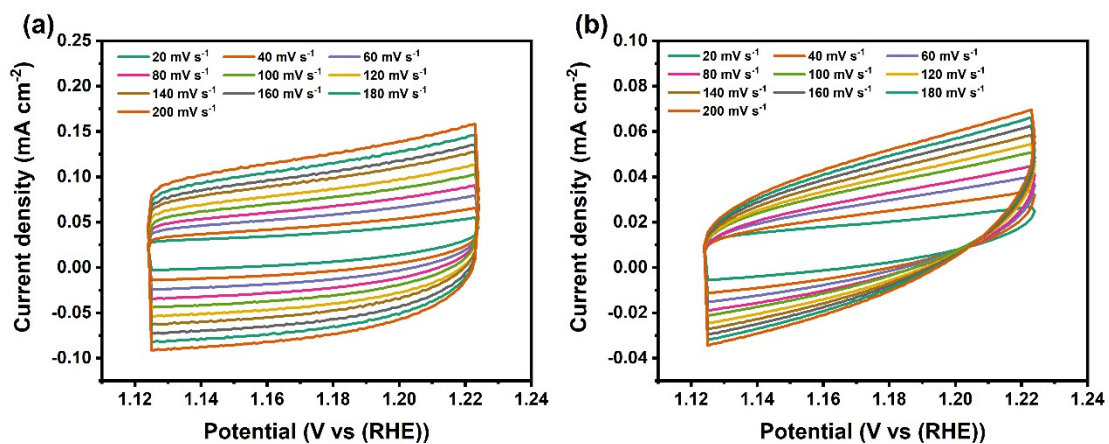

**Fig. S10** (a) CV curve of CUST-576&AB (1:2) in 1M KOH (20-200mV s<sup>-1</sup>), (b) CV curve of CUST-576 in 1M KOH (20-200mV s<sup>-1</sup>).

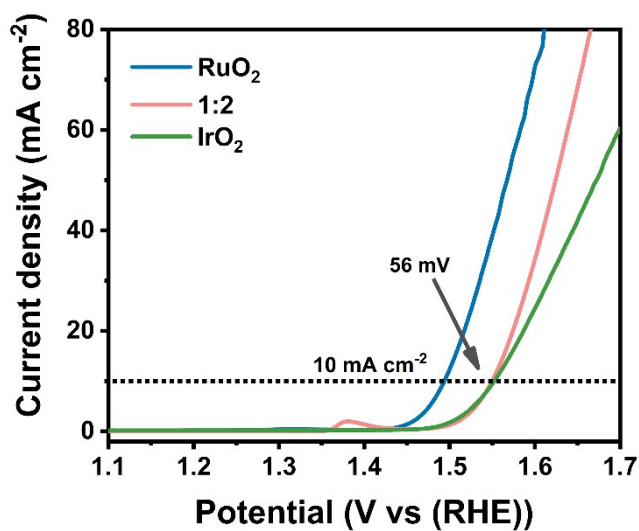

**Fig. S11** (a) CV curve of CUST-576&AB (1:2), RuO<sub>2</sub>, and IrO<sub>2</sub> in 1M KOH.

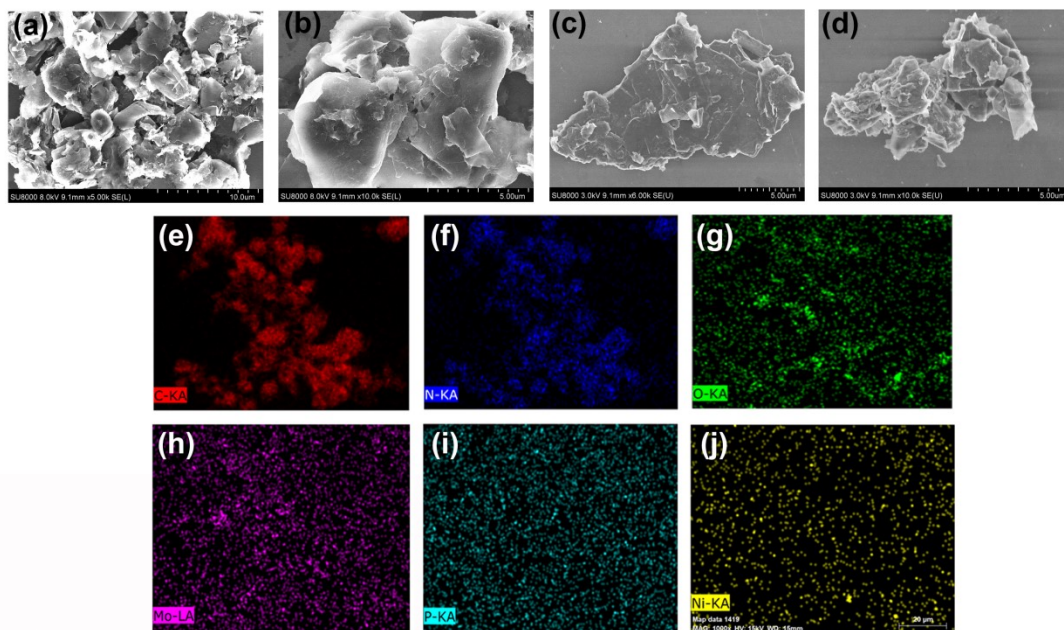

**Fig. S12** SEM image of CUST-576&AB: (a-b) after OER and (c-d) after the long-term stability, EDX elemental mapping images of CUST-576&AB after OER (e-j).

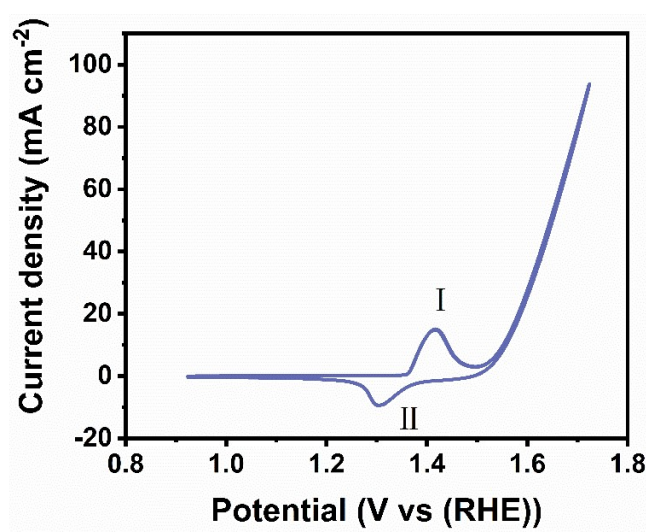

**Fig. S13** Cyclic voltammetry curve of CUST-576&AB in 1.0 M KOH.

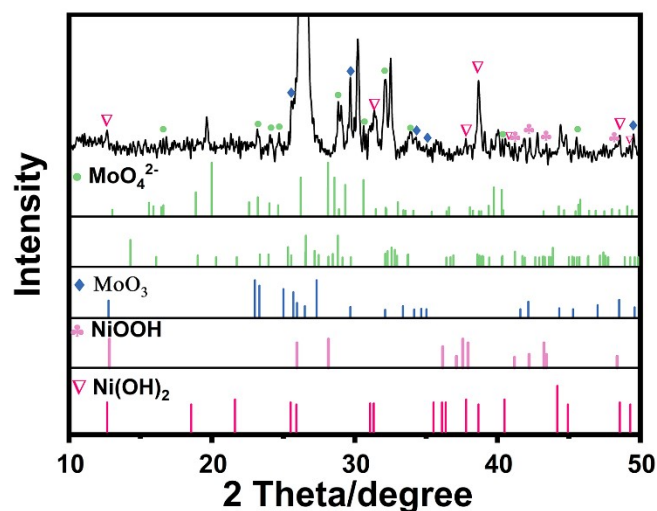

Fig. S14 XRD pattern of CUST-576&AB after OER.

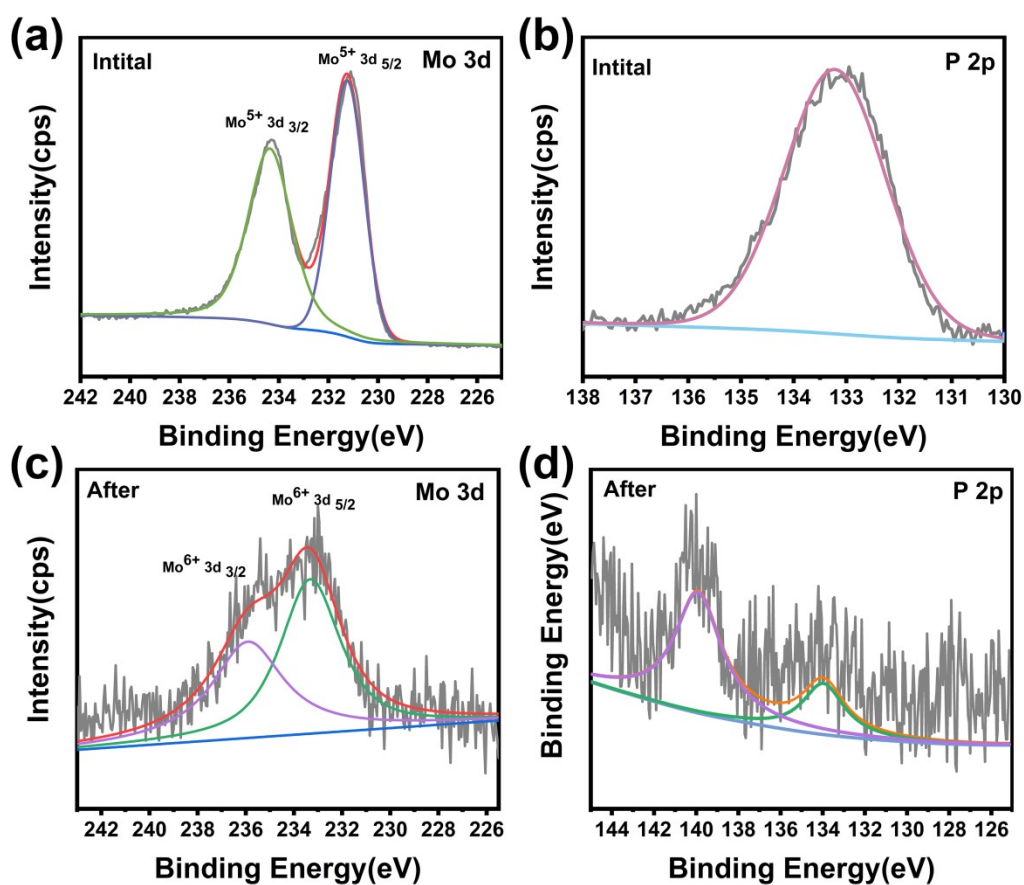

Fig. S15 XPS image of CUST-576 and CUST-576&AB. Initial: (a) Mo 3d, (b) P 2p. After: (c) Mo 3d, (d) P 2p. The dotted curve was used to demonstrate the experimental data, while the solid line was used to illustrate the fitting results.

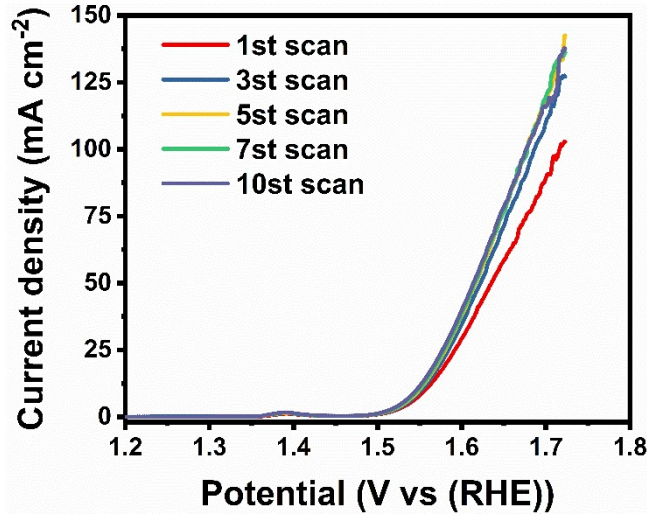

Fig. S16 The first-ten-cycle LSV curves in 1 M KOH after OER.

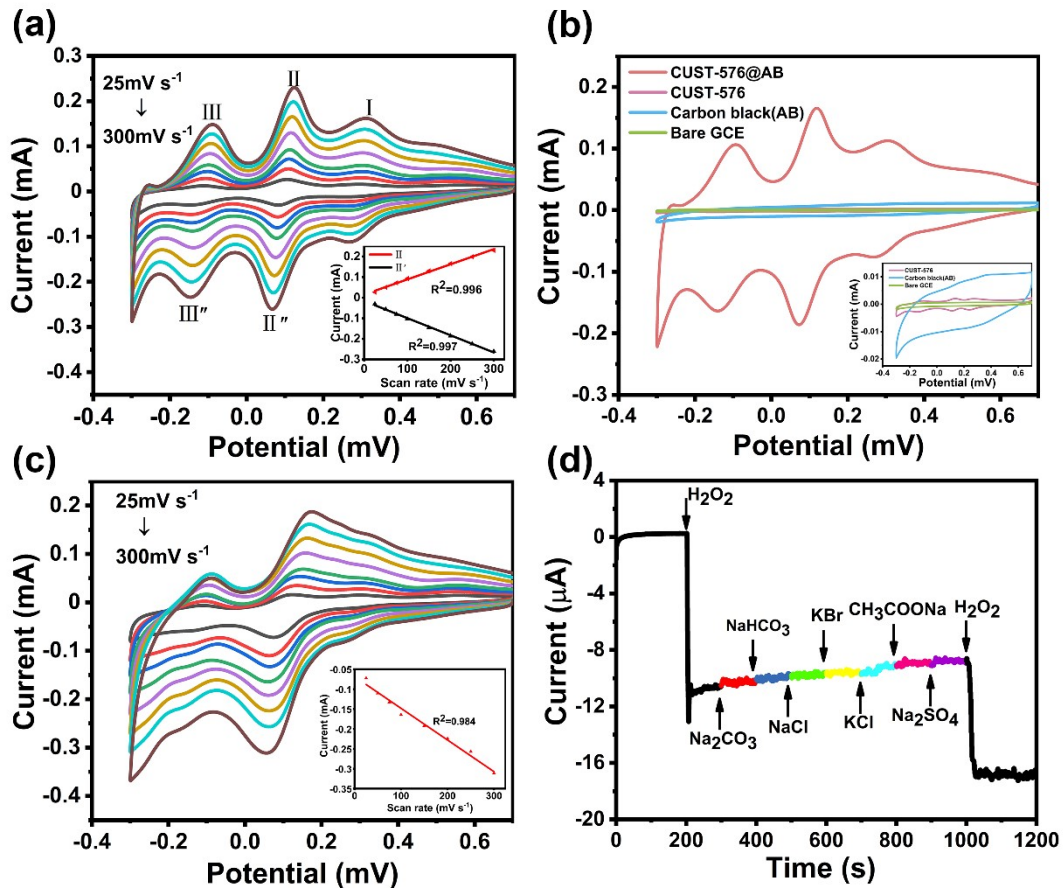

Fig. S17 (a) CVs (Cyclic Voltammograms) of  $\{P_4Mo_6\}$ -GCE at different scanning rates, (b) CV comparison of GCE, AB, CUST-576, and CUST-576@AB, (c) CVs of  $\{P_4Mo_6\}$ -GCE at different scanning rates in 4 mM  $H_2O_2$ , (d) Interference testing.

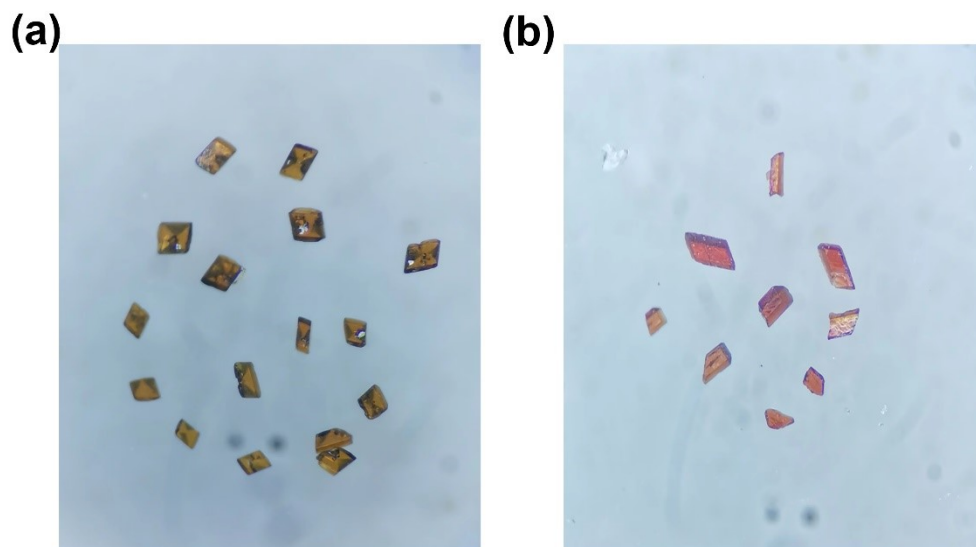

**Fig. S18** Optical microscopic images of CUST-576 and CUST-576(Ni<sub>0</sub>): (a) and (b).

**Table S1.** Crystal data and structure refinement for CUST-576

|                                          |                                                                                                                 |
|------------------------------------------|-----------------------------------------------------------------------------------------------------------------|
| Identification code                      | CUST-576                                                                                                        |
| CCDC Number                              | 2258244                                                                                                         |
| Empirical formula                        | C <sub>30</sub> H <sub>42</sub> Mo <sub>12</sub> N <sub>12</sub> Ni <sub>3</sub> O <sub>66</sub> P <sub>8</sub> |
| Formula weight                           | 3191.84                                                                                                         |
| Temperature / K                          | 283(2)                                                                                                          |
| Crystal system                           | triclinic                                                                                                       |
| Space group                              | P-1                                                                                                             |
| a/Å                                      | 11.951(6)                                                                                                       |
| b/Å                                      | 12.870(5)                                                                                                       |
| c/Å                                      | 14.901(7)                                                                                                       |
| α/°                                      | 84.43(2)                                                                                                        |
| β/°                                      | 75.38(3)                                                                                                        |
| γ/°                                      | 69.44(2)                                                                                                        |
| Volume/Å <sup>3</sup>                    | 2076.3(17)                                                                                                      |
| Z                                        | 1                                                                                                               |
| ρ <sub>calc</sub> g/cm <sup>3</sup>      | 2.553                                                                                                           |
| μ/mm <sup>-1</sup>                       | 2.684                                                                                                           |
| F (000)                                  | 1532.0                                                                                                          |
| Crystal size/mm <sup>3</sup>             | 0.24 × 0.22 × 0.2                                                                                               |
| Radiation                                | Mo Kα (λ = 0.71073)                                                                                             |
| 2θ range for data collection/°           | 5.192 to 50.082                                                                                                 |
| Index ranges                             | -14 ≤ h ≤ 14, -15 ≤ k ≤ 15, -17 ≤ l ≤ 17                                                                        |
| Reflections collected                    | 27577                                                                                                           |
| Independent reflections                  | 7254 [Rint = 0.0865, Rsigma = 0.0735]                                                                           |
| Data/restraints/parameters               | 7254/6/555                                                                                                      |
| GOF on F <sup>2</sup>                    | 1.024                                                                                                           |
| Final R <sub>indexes</sub> [I >= 2σ (I)] | R <sub>1</sub> = 0.0430, wR <sub>2</sub> = 0.0882                                                               |
| Final R <sub>indexes</sub> [all data]    | R <sub>1</sub> = 0.0736, wR <sub>2</sub> = 0.0984                                                               |

**Table S2.** Bond Lengths for **CUST-576**.

---

|     |                |                   |
|-----|----------------|-------------------|
| Mo1 | Mo4 2.5943(13) | Ni2 O242 2.124(5) |
| Mo1 | O3 2.324(5)    | Ni2 O29 2.030(6)  |
| Mo1 | O4 1.973(5)    | Ni2 O30 2.042(6)  |
| Mo1 | O7 2.088(5)    | Ni2 O32 2.091(6)  |
| Mo1 | O10 1.944(5)   | Ni2 N6 2.023(4)   |
| Mo1 | O13 2.065(5)   | P1 O3 1.538(5)    |
| Mo1 | O27 1.691(5)   | P1 O5 1.555(5)    |
| Mo2 | Mo5 2.5964(16) | P1 O9 1.550(5)    |
| Mo2 | O2 1.996(5)    | P1 O17 1.509(5)   |
| Mo2 | O6 2.109(5)    | P2 O14 1.548(5)   |
| Mo2 | O9 2.309(5)    | P2 O18 1.538(5)   |
| Mo2 | O12 1.938(5)   | P2 O29 1.508(6)   |
| Mo2 | O18 2.073(5)   | P2 O33 1.579(6)   |
| Mo2 | O28 1.669(5)   | P3 O13 1.559(5)   |
| Mo3 | Mo6 2.5860(14) | P3 O15 1.534(5)   |
| Mo3 | O1 1.980(5)    | P3 O24 1.497(5)   |
| Mo3 | O5 2.250(5)    | P3 O26 1.570(5)   |
| Mo3 | O8 2.088(5)    | P4 O16 1.518(6)   |
| Mo3 | O11 1.937(5)   | P4 O21 1.522(6)   |
| Mo3 | O21 2.091(5)   | P4 O23 1.572(6)   |
| Mo3 | O22 1.686(5)   | P4 O31 1.551(6)   |
| Mo4 | O4 1.991(5)    | C1 C2 1.4200      |
| Mo4 | O6 2.082(5)    | C1 N2 1.4200      |
| Mo4 | O9 2.260(5)    | C2 N1 1.4200      |
| Mo4 | O10 1.936(5)   | N1 C3 1.4200      |
| Mo4 | O14 2.058(5)   | C3 N2 1.4200      |
| Mo4 | O25 1.680(5)   | N2 C12 1.378(5)   |
| Mo5 | O2 1.993(5)    | C4 N3 1.4200      |
| Mo5 | O5 2.278(5)    | C4 N4 1.4200      |
| Mo5 | O8 2.119(5)    | N3 C5 1.4200      |
| Mo5 | O12 1.934(5)   | N3 C10 1.354(5)   |
| Mo5 | O16 2.094(5)   | C5 C6 1.4200      |
| Mo5 | O19 1.668(5)   | C6 N4 1.4200      |
| Mo6 | O1 1.975(5)    | C7 C8 1.3900      |
| Mo6 | O3 2.322(5)    | C7 C12 1.3900     |
| Mo6 | O7 2.098(5)    | C8 C9 1.3900      |
| Mo6 | O11 1.945(5)   | C8 N5 1.359(5)    |
| Mo6 | O15 2.083(5)   | C9 C10 1.3900     |
| Mo6 | O20 1.671(5)   | C10 C11 1.3900    |

---



---

|     |     |          |         |        |
|-----|-----|----------|---------|--------|
| Ni1 | O1  | 2.160(5) | C11 C12 | 1.3900 |
| Ni1 | O11 | 2.160(5) | C13 N5  | 1.4200 |
| Ni1 | O21 | 2.148(5) | C13 N6  | 1.4200 |
| Ni1 | O2  | 2.148(5) | N5 C14  | 1.4200 |
| Ni1 | O4  | 2.113(5) | C14 C15 | 1.4200 |
| Ni1 | O41 | 2.113(5) | C15 N6  | 1.4200 |
| Ni2 | O17 | 2.068(5) |         |        |

---

**Table S3. Bond Angles for CUST-576.**

---

|     |         |            |     |          |            |
|-----|---------|------------|-----|----------|------------|
| O3  | Mo1 Mo4 | 88.22(12)  | O20 | Mo6 O11  | 105.6(2)   |
| O4  | Mo1 Mo4 | 49.42(14)  | O20 | Mo6 O15  | 97.7(2)    |
| O4  | Mo1 O3  | 81.03(18)  | O11 | Ni1 O1   | 180.00(19) |
| O4  | Mo1 O7  | 86.05(19)  | O2  | Ni1 O11  | 83.83(18)  |
| O4  | Mo1 O13 | 159.5(2)   | O2  | Ni1 O1   | 96.18(18)  |
| O7  | Mo1 Mo4 | 134.47(13) | O21 | Ni1 O1   | 83.83(18)  |
| O7  | Mo1 O3  | 73.84(18)  | O21 | Ni1 O11  | 96.17(18)  |
| O10 | Mo1 Mo4 | 47.91(15)  | O21 | Ni1 O2   | 180.0      |
| O10 | Mo1 O3  | 82.60(19)  | O41 | Ni1 O1   | 83.41(18)  |
| O10 | Mo1 O4  | 95.6(2)    | O41 | Ni1 O11  | 96.59(18)  |
| O10 | Mo1 O7  | 155.8(2)   | O4  | Ni1 O11  | 83.41(18)  |
| O10 | Mo1 O13 | 87.6(2)    | O4  | Ni1 O1   | 96.59(18)  |
| O13 | Mo1 Mo4 | 135.21(14) | O4  | Ni1 O21  | 84.44(18)  |
| O13 | Mo1 O3  | 79.35(18)  | O41 | Ni1 O21  | 95.56(18)  |
| O13 | Mo1 O7  | 82.9(2)    | O4  | Ni1 O2   | 95.55(18)  |
| O27 | Mo1 Mo4 | 99.23(18)  | O41 | Ni1 O2   | 84.44(18)  |
| O27 | Mo1 O3  | 172.2(2)   | O41 | Ni1 O4   | 180.0      |
| O27 | Mo1 O4  | 102.1(2)   | O17 | Ni2 O242 | 173.6(2)   |
| O27 | Mo1 O7  | 99.1(2)    | O17 | Ni2 O32  | 92.8(2)    |
| O27 | Mo1 O10 | 104.1(2)   | O29 | Ni2 O17  | 97.1(2)    |
| O27 | Mo1 O13 | 96.7(2)    | O29 | Ni2 O242 | 86.7(2)    |
| O2  | Mo2 Mo5 | 49.35(14)  | O29 | Ni2 O30  | 177.6(2)   |
| O2  | Mo2 O6  | 85.27(19)  | O29 | Ni2 O32  | 87.4(2)    |
| O2  | Mo2 O9  | 79.66(18)  | O30 | Ni2 O17  | 84.4(2)    |
| O2  | Mo2 O18 | 157.93(19) | O30 | Ni2 O242 | 91.6(2)    |
| O6  | Mo2 Mo5 | 133.69(14) | O30 | Ni2 O32  | 90.6(2)    |
| O6  | Mo2 O9  | 72.72(18)  | O32 | Ni2 O242 | 82.2(2)    |
| O9  | Mo2 Mo5 | 88.25(12)  | N6  | Ni2 O17  | 91.9(2)    |
| O12 | Mo2 Mo5 | 47.83(15)  | N6  | Ni2 O242 | 93.1(2)    |
| O12 | Mo2 O2  | 95.3(2)    | N6  | Ni2 O29  | 92.5(2)    |
| O12 | Mo2 O6  | 155.6(2)   | N6  | Ni2 O30  | 89.3(2)    |
| O12 | Mo2 O9  | 83.38(19)  | N6  | Ni2 O32  | 175.3(2)   |
| O12 | Mo2 O18 | 85.7(2)    | O3  | P1 O5    | 108.3(3)   |
| O18 | Mo2 Mo5 | 133.04(15) | O3  | P1 O9    | 107.8(3)   |
| O18 | Mo2 O6  | 84.9(2)    | O9  | P1 O5    | 108.1(3)   |
| O18 | Mo2 O9  | 78.56(18)  | O17 | P1 O3    | 113.4(3)   |
| O28 | Mo2 Mo5 | 101.2(2)   | O17 | P1 O5    | 106.5(3)   |
| O28 | Mo2 O2  | 102.9(2)   | O17 | P1 O9    | 112.4(3)   |
| O28 | Mo2 O6  | 97.2(2)    | O14 | P2 O33   | 105.4(3)   |

---

---

|     |         |            |         |     |            |
|-----|---------|------------|---------|-----|------------|
| O28 | Mo2 O9  | 169.5(2)   | O18 P2  | O14 | 109.7(3)   |
| O28 | Mo2 O12 | 106.4(2)   | O18 P2  | O33 | 104.6(3)   |
| O28 | Mo2 O18 | 97.9(2)    | O29 P2  | O14 | 114.9(3)   |
| O1  | Mo3 Mo6 | 49.09(13)  | O29 P2  | O18 | 113.0(3)   |
| O1  | Mo3 O5  | 79.97(19)  | O29 P2  | O33 | 108.4(3)   |
| O1  | Mo3 O8  | 86.67(19)  | O13 P3  | O26 | 109.2(3)   |
| O1  | Mo3 O21 | 158.6(2)   | O15 P3  | O13 | 110.9(3)   |
| O5  | Mo3 Mo6 | 89.36(13)  | O15 P3  | O26 | 108.5(3)   |
| O8  | Mo3 Mo6 | 135.05(14) | O24 P3  | O13 | 109.7(3)   |
| O8  | Mo3 O5  | 73.06(18)  | O24 P3  | O15 | 111.5(3)   |
| O8  | Mo3 O21 | 84.4(2)    | O24 P3  | O26 | 107.0(3)   |
| O11 | Mo3 Mo6 | 48.36(15)  | O16 P4  | O21 | 113.0(3)   |
| O11 | Mo3 O1  | 95.8(2)    | O16 P4  | O23 | 112.5(3)   |
| O11 | Mo3 O5  | 85.3(2)    | O16 P4  | O31 | 108.5(3)   |
| O11 | Mo3 O8  | 157.5(2)   | O21 P4  | O23 | 110.6(3)   |
| O11 | Mo3 O21 | 85.4(2)    | O21 P4  | O31 | 110.7(3)   |
| O21 | Mo3 Mo6 | 133.26(15) | O31 P4  | O23 | 100.8(3)   |
| O21 | Mo3 O5  | 78.83(19)  | Mo3 O1  | Ni1 | 135.7(2)   |
| O22 | Mo3 Mo6 | 101.54(19) | Mo6 O1  | Mo3 | 81.67(19)  |
| O22 | Mo3 O1  | 104.7(2)   | Mo6 O1  | Ni1 | 134.0(2)   |
| O22 | Mo3 O5  | 168.6(2)   | Mo2 O2  | Ni1 | 135.7(2)   |
| O22 | Mo3 O8  | 96.7(2)    | Mo5 O2  | Mo2 | 81.22(18)  |
| O22 | Mo3 O11 | 104.3(2)   | Mo5 O2  | Ni1 | 134.2(2)   |
| O22 | Mo3 O21 | 95.6(2)    | Mo6 O3  | Mo1 | 98.10(18)  |
| O4  | Mo4 Mo1 | 48.82(14)  | P1 O3   | Mo1 | 126.2(3)   |
| O4  | Mo4 O6  | 86.17(19)  | P1 O3   | Mo6 | 125.2(3)   |
| O4  | Mo4 O9  | 80.25(18)  | Mo1 O4  | Mo4 | 81.76(18)  |
| O4  | Mo4 O14 | 159.4(2)   | Mo1 O4  | Ni1 | 135.0(2)   |
| O6  | Mo4 Mo1 | 134.45(14) | Mo4 O4  | Ni1 | 135.6(2)   |
| O6  | Mo4 O9  | 74.23(18)  | Mo3 O5  | Mo5 | 101.54(19) |
| O9  | Mo4 Mo1 | 89.29(12)  | P1 O5   | Mo3 | 126.9(3)   |
| O10 | Mo4 Mo1 | 48.17(15)  | P1 O5   | Mo5 | 125.7(3)   |
| O10 | Mo4 O4  | 95.3(2)    | Mo4 O6  | Mo2 | 112.8(2)   |
| O10 | Mo4 O6  | 158.5(2)   | Mo1 O7  | Mo6 | 113.9(2)   |
| O10 | Mo4 O9  | 84.83(19)  | Mo3 O8  | Mo5 | 113.0(2)   |
| O10 | Mo4 O14 | 86.4(2)    | Mo4 O9  | Mo2 | 99.58(18)  |
| O14 | Mo4 Mo1 | 134.15(15) | P1 O9   | Mo2 | 126.0(3)   |
| O14 | Mo4 O6  | 85.0(2)    | P1 O9   | Mo4 | 127.5(3)   |
| O14 | Mo4 O9  | 79.46(19)  | Mo4 O10 | Mo1 | 83.92(19)  |
| O25 | Mo4 Mo1 | 101.34(18) | Mo3 O11 | Mo6 | 83.5(2)    |

---

---

|     |         |            |         |          |           |
|-----|---------|------------|---------|----------|-----------|
| O25 | Mo4 O4  | 103.3(2)   | Mo5 O12 | Mo2      | 84.23(19) |
| O25 | Mo4 O6  | 94.9(2)    | P3      | O13 Mo1  | 134.7(3)  |
| O25 | Mo4 O9  | 168.5(2)   | P2      | O14 Mo4  | 129.7(3)  |
| O25 | Mo4 O10 | 105.5(2)   | P3      | O15 Mo6  | 131.5(3)  |
| O25 | Mo4 O14 | 95.9(2)    | P4      | O16 Mo5  | 129.7(3)  |
| O2  | Mo5 Mo2 | 49.43(14)  | P1      | O17 Ni2  | 133.5(3)  |
| O2  | Mo5 O5  | 80.42(19)  | P2      | O18 Mo2  | 130.2(3)  |
| O2  | Mo5 O8  | 87.92(19)  | P4      | O21 Mo3  | 129.3(3)  |
| O2  | Mo5 O16 | 158.8(2)   | P3      | O24 Ni22 | 136.7(3)  |
| O5  | Mo5 Mo2 | 89.72(13)  | P2      | O29 Ni2  | 158.3(4)  |
| O8  | Mo5 Mo2 | 136.37(14) | N2      | C1 C2    | 108.0     |
| O8  | Mo5 O5  | 71.93(18)  | N1      | C2 C1    | 108.0     |
| O12 | Mo5 Mo2 | 47.95(16)  | C3      | N1 C2    | 108.0     |
| O12 | Mo5 O2  | 95.5(2)    | N2      | C3 N1    | 108.0     |
| O12 | Mo5 O5  | 84.56(19)  | C1      | N2 C3    | 108.0     |
| O12 | Mo5 O8  | 155.4(2)   | C12     | N2 C1    | 127.1(4)  |
| O12 | Mo5 O16 | 84.1(2)    | C12     | N2 C3    | 124.9(4)  |
| O16 | Mo5 Mo2 | 131.63(16) | N3      | C4 N4    | 108.0     |
| O16 | Mo5 O5  | 78.43(19)  | C5      | N3 C4    | 108.0     |
| O16 | Mo5 O8  | 84.1(2)    | C10     | N3 C4    | 125.3(4)  |
| O19 | Mo5 Mo2 | 101.7(2)   | C10     | N3 C5    | 126.7(4)  |
| O19 | Mo5 O2  | 103.8(2)   | C6      | C5 N3    | 108.0     |
| O19 | Mo5 O5  | 167.9(2)   | C5      | C6 N4    | 108.0     |
| O19 | Mo5 O8  | 96.7(2)    | C6      | N4 C4    | 108.0     |
| O19 | Mo5 O12 | 106.1(2)   | C8      | C7 C12   | 120.0     |

---
